# Supplementary material for: Lysosome sorting of β-glucocerebrosidase by LIMP-2 is targeted by the mannose 6-phosphate receptor
Source: PubMed Central journal article supplement (PMC4104448; doi:10.1038/ncomms5321), 2014-07-14
Supplement: ncomms5321-s1.pdf [file ncomms5321-s1.pdf]

**a**

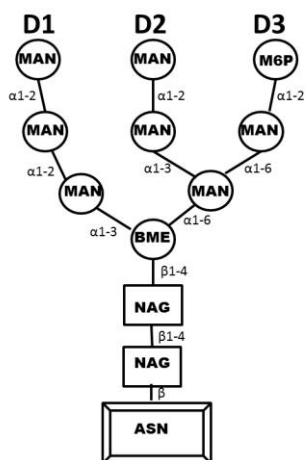

**b**

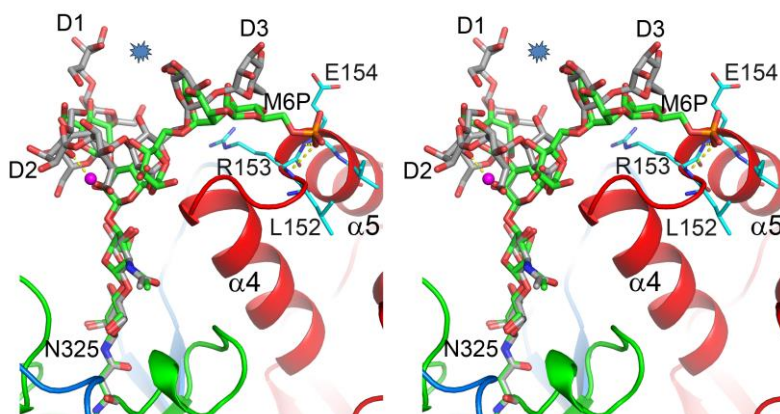

**Supplementary Figure 1 | The N-linked P-Man<sub>9</sub>GlcNAc<sub>2</sub> at N325.** (a) Diagrammatic representation of the N-linked P-Man<sub>9</sub>GlcNAc<sub>2</sub>. The three branches of the oligosaccharide are designated D1, D2 and D3. NAG: N-Acetylglucosamine; BME:  $\beta$ -Mannose; MAN:  $\alpha$ -Mannose; M6P: Mannose-6-phosphate. (b) Stereo diagram comparing the N-linked glycan at N325 in space groups  $C222_1$  (grey) and  $C2$  (green). Protein side-chains around M6P in space group  $C2$  are shown as cyan sticks. The star marks the approximate position of a helical turn (residues 121-125) from a symmetry related molecule.

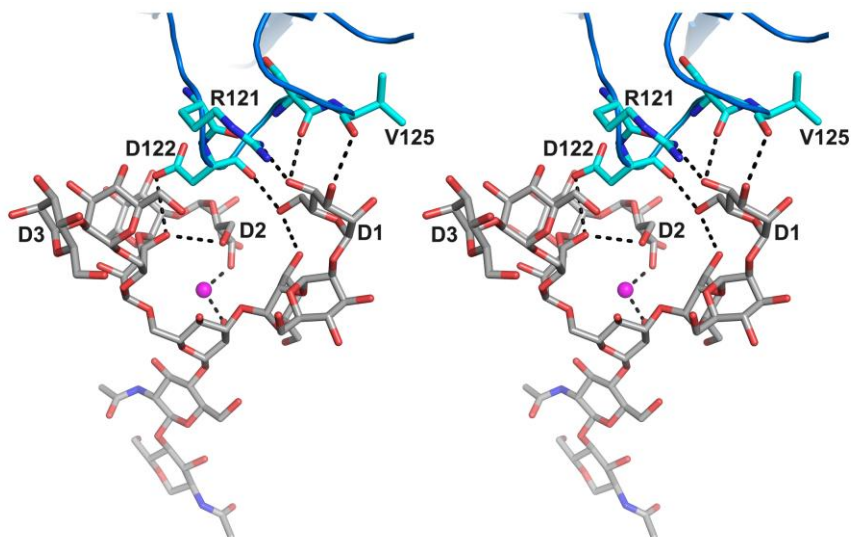

**Supplementary Figure 2 | Stereo diagram showing interactions between the N-linked glycan at N325 and a helical turn (residues 121-125) from a symmetry related molecule in space group  $C222_1$ .** The N-linked P-Man<sub>9</sub>GlcNAc<sub>2</sub> is drawn as grey sticks, Na<sup>+</sup> as magenta sphere. The main-chain of the symmetry related molecule is shown as ribbons, residues interacting with the glycan as cyan sticks. The dotted lines represent H-bonds.

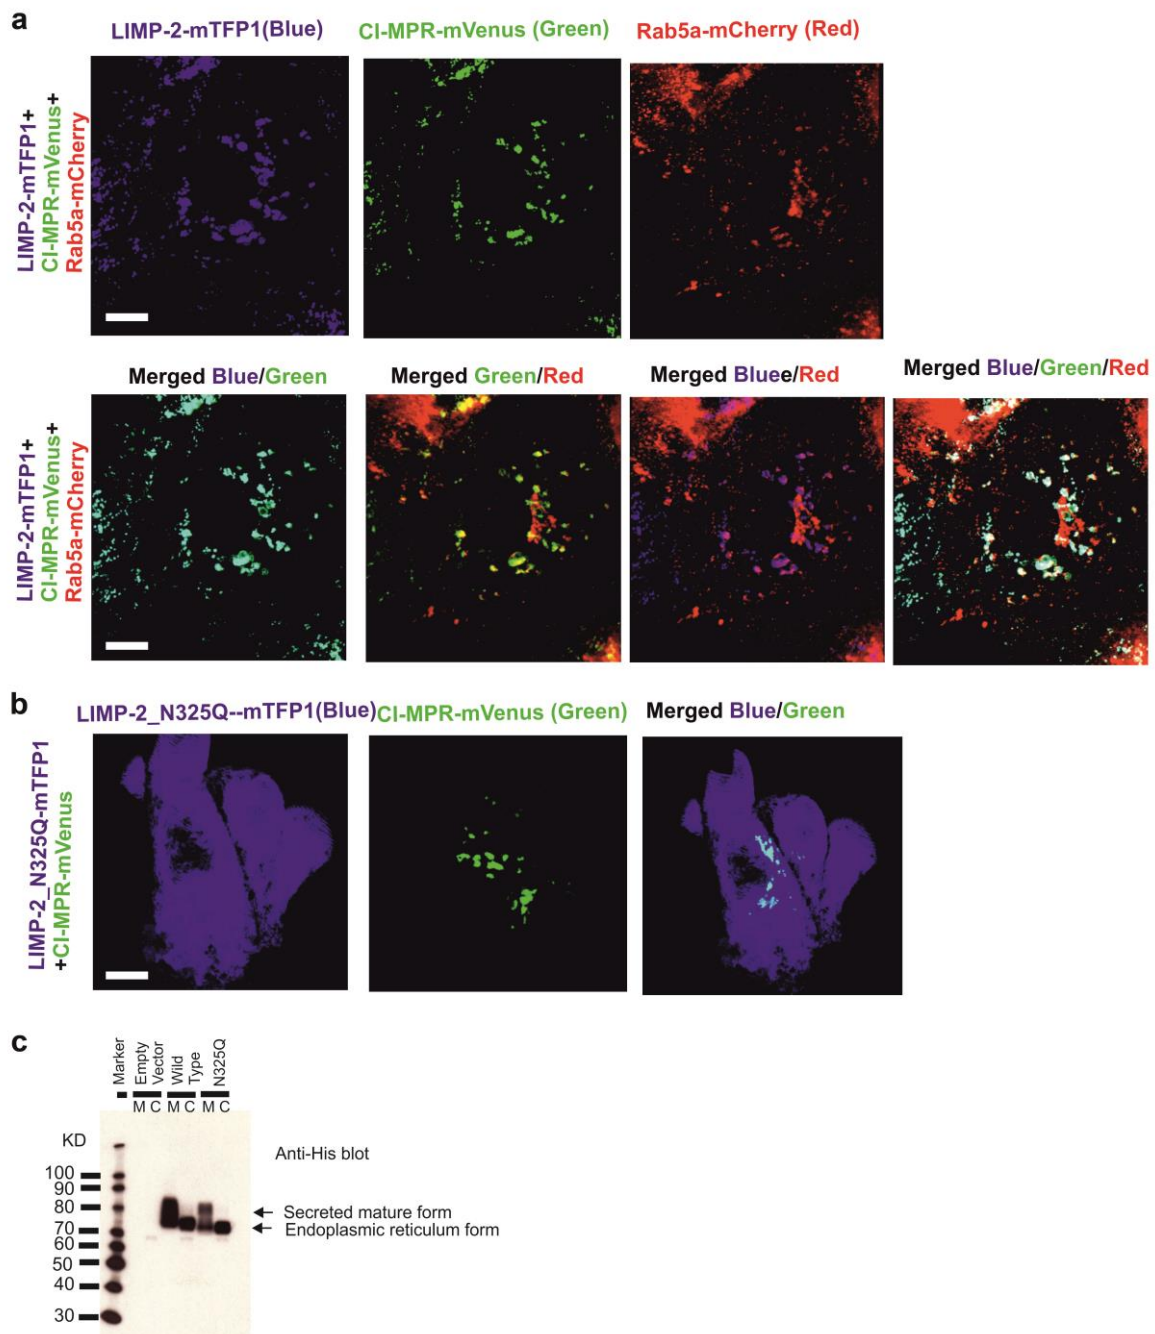

**Supplementary Figure 3 | LIMP-2 and CI-MPR co-localization in living cells and Western blot analyses.** (a) First row shows confocal images of COS-7 cells co-expressing LIMP2-mTFP1, MPR-mVenus and Rab5a-mCherry respectively. Second row shows overlapping images. It shows that LIMP-2 and CI-MPR are well co-localized, and both of them are only partially co-localized with the early endosome marker Rab5a. (b) The diffusive pattern of LIMP-2-N325Q-mTFP1 (first panel), the punctate appearance of CI-MPR-mVenus (second panel) and overlapping image shows little co-localization. The scale bar is 5  $\mu$ m. (c) Western blot analyses of secreted wild type and mutant constructs of LIMP-2 luminal domain. Wild type and N325Q mutant LIMP-2 luminal domain with a C-terminal His tag were expressed in HEK293T cells for 2 days. Protein samples from the conditioned media (M) or cell lysate (C) were reduced and resolved on the SDS-PAGE gel, blotted to nitrocellular membrane and probed with anti-His tag antibody.

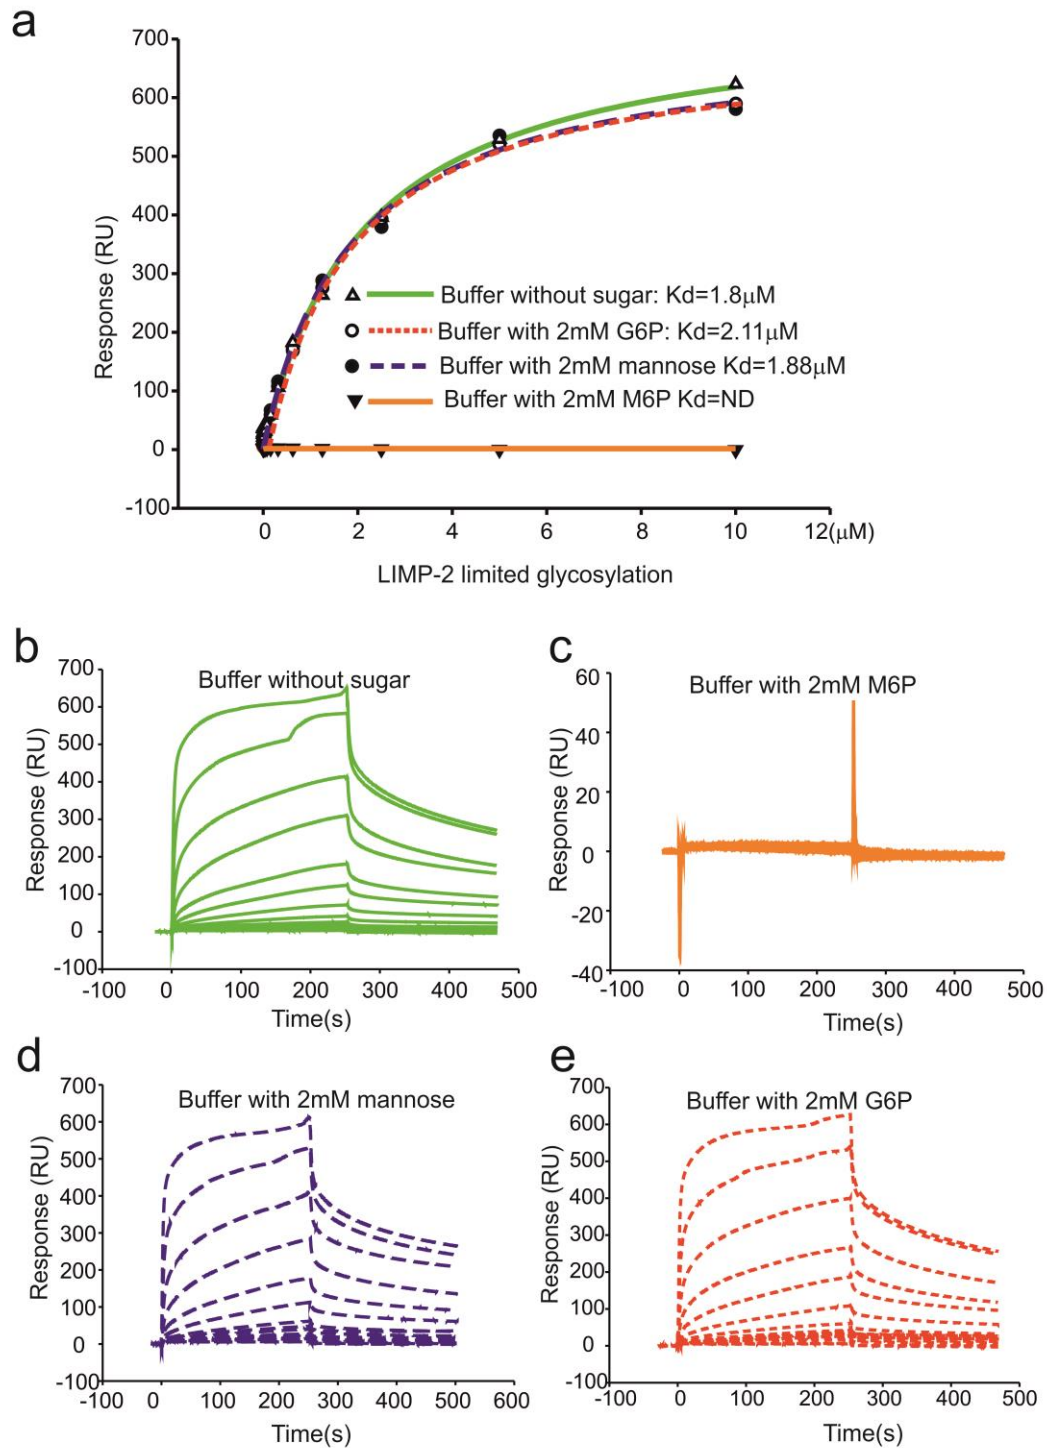

**Supplementary Figure 4 | SPR experiments of LIMP-2 (limited glycosylation) and CI-MPR binding.** Biotinylated human CI-MPR domains 1-15 was immobilized in a CM5 chip. LIMP-2 produced from HEK293S GNTI- cells (limited glycosylation) was used as analyte. (a) Summary of effects of sugars on MPR1-15 and LIMP-2 binding. (b-e) SPR sensorgrams of MPR1-15 and LIMP-2 binding without sugar, with 2mM M6P, 2mM mannose and 2mM G6P, respectively.

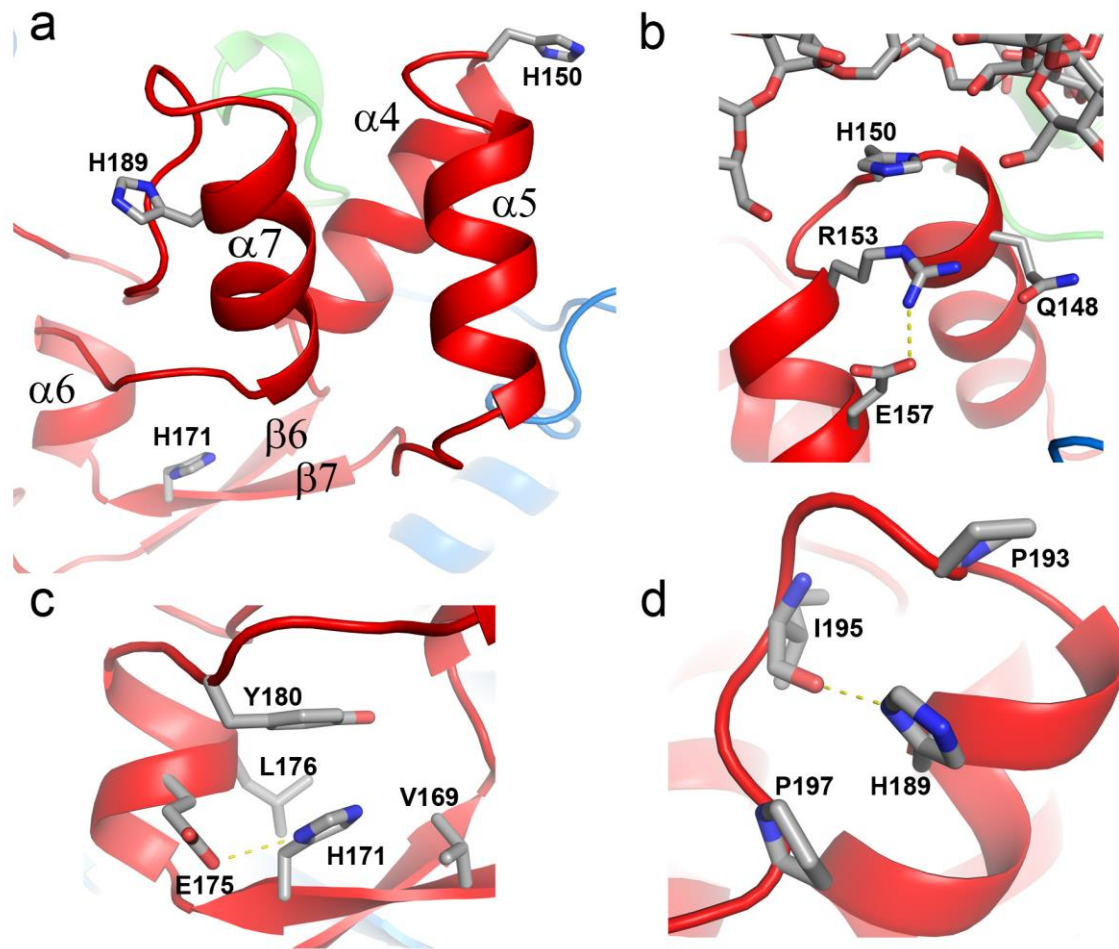

**Supplementary Figure 5 | Overall structure of the LIMP-2 domain II.** (a) Overall structure of domain II and the positions of three histidine residues within the domain. (b), (c) and (d) Environments around H150, H171 and H189, respectively. Yellow dotted lines represent H-bonds.





|                         | N45 | N68 | N105 | N206 | N224 | N249 | N304 | N325 | N412 |
|-------------------------|-----|-----|------|------|------|------|------|------|------|
| <i>C2</i>               | 1   | 5   | 0    | 6    | 1    | 3    | 2    | 7    | 5    |
| <i>C222<sub>1</sub></i> | 1   | 4   | 0    | 2    | 1    | 3    | 2    | 11   | 5    |

**Supplementary Table 1 | Number of glycan residues modelled at each glycosylation site of LIMP-2 in space group *C2* and *C222<sub>1</sub>*.** Note: electron density at N105 site confirms the site is glycosylated, but is not sufficient for modelling the glycan.

|                                                 |                |                                                   |
|-------------------------------------------------|----------------|---------------------------------------------------|
| <b>Primers for LIMP-2 protein expression</b>    | LIMP-2-V28-F   | gtac <u>accggt</u> GTCTTCCAGAAGGCTGTAGAC          |
|                                                 | LIMP-2-T431-R  | cagt <u>ggtacc</u> AGTGTTAATCATAGACTTCAGTC        |
| <b>Primers for LIMP-2 FLIM-FRET experiments</b> | LIMP-2-M1-F    | catga <u>attcacc</u> ATGGGCCGATGCTGCTTCTAC        |
|                                                 | LIMP-2-T478-R  | catc <u>ggtacc</u> GGTTCGAATGAGGGGTGCTCT          |
|                                                 | LIMP-2-N325Q-F | CTGGGCTCAGGAGTTCTG <u>cag</u> GTCAGCATCTGCAAGAATG |
|                                                 | LIMP-2-N325Q-R | CATTCTTGCAGATGCTGAC <u>ctg</u> CAGAACTCCTGAGCCCAG |
|                                                 | CI-MPR-Q41-F   | gctc <u>accggt</u> CAGGCCGCCCGTTCCCCGAGCTGT       |
|                                                 | CI-MPR-G2293-R | catc <u>ggtacc</u> GTCGTCCCCGGGATTCTCGCTGT        |
| <b>Primers for SPR experiments</b>              | GBA-1-F        | catga <u>attcgccacc</u> ATGGAGTTTTCAAGTCCTTCC     |
|                                                 | GBA-1-R        | cagt <u>ggtacc</u> CTGGCGATGCCACAGGTAGGTG         |
|                                                 | CI-MPR-Q41-F   | gctc <u>accggt</u> CAGGCCGCCCGTTCCCCGAGCTGT       |
|                                                 | CI-MPR-L489R   | catc <u>ggtacc</u> CAGCGCGGACAGGTCATAGCG          |
|                                                 | CI-MPR-I2491-R | catc <u>ggtacc</u> GATGTGTAAGAGGTCCTCGTCGCTG      |
|                                                 | LIMP-2-H150T-F | TAGAGTGGTCCCAGGTG <u>aca</u> TTCCTCAGGGAGATC      |
|                                                 | LIMP-2-H150T-R | GATCTCCCTGAGGAA <u>tgt</u> CACCTGGGACCACTCTA      |

**Supplementary Table 2 | Primers used for PCR amplification.** The restriction sites are underlined.



## References

1. Loeb, J.E., Cordier, W.S., Harris, M.E., Weitzman, M.D. & Hope, T.J. Enhanced expression of transgenes from adeno-associated virus vectors with the woodchuck hepatitis virus posttranscriptional regulatory element: implications for gene therapy. *Hum Gene Ther* 10, 2295-305 (1999).
2. Green, S.R. & Mathews, M.B. Two RNA-binding motifs in the double-stranded RNA-activated protein kinase, DAI. *Genes Dev* 6, 2478-90 (1992).
